# Supplementary material
Source: publisher figshare collection journal article supplement (https://karger.figshare.com/ndownloader/files/37480750)
Supplement: Supplementary file 1 [file 37480750]

**Supplemental Table 2.**

| **Category** | **Medication Name** | **Creatinine clearance, ml/min** | **ATC code** |
| --- | --- | --- | --- |
| Anti-infective | Ciprofloxacin | <30 | J01MA02 |
| Trimethoprimsulfamethoxazole | <30 | J01EE01 |
| Cardiovascular or hemostasis | Amiloride | <30 | C03EA01 |
| Apixaban | <25 | B01AF02 |
| Dabigatran | <30 | B01AE07 |
| Dofetilide | <60 | C01BD04 |
| Edoxaban | <15 | B01AF03 |
| Enoxaparin | <30 | B01AB05 |
| Fondaparinux | <30 | B01AX05 |
| Rivaroxaban | <50 | B01AF01 |
| Spironolactone | <30 | C03DA01 |
| Triamterene | <30 | C03DB02 |
| Central nervous system and analgesics | Duloxetine | <30 | N06AX21 |
| Gabapentin | <60 | N03AX12 |
| Levetiracetam | ≤80 | N03AX14 |
| Pregabalin | <60 | N03AX16 |
| Tramadol | <30 | N02AJ13 |
| Gastrointestinal | Cimetidine | <50 | A02BA01 |
| Famotidine | <50 | A02BA03 |
| Nizatidine | <50 | A02BA04 |
| Ranitidine | <50 | A02BA02 |
| Hyperuricemia | Colchicine | <30 | M04AC01 |
| Probenecid | <30 | M04AB01 |
